# Supplementary material for: Temporal-Difference Reinforcement Learning with Distributed Representations
Source: PubMed Central journal article supplement (PMC2760757; doi:10.1371/journal.pone.0007362), 2009-10-20
Supplement: pone.0007362.s001.pdf [file pone.0007362.s001.pdf]

# Temporal-difference reinforcement learning with distributed representations

Zeb Kurth-Nelson, A. David Redish

Appendix S1

**Hyperbolic discounting from a sum of exponentials.** The summed effect of these exponential discounting functions provides the overall agent with hyperbolic discounting:

$$\int_0^1 \gamma^x d\gamma = \frac{1}{1+x} \quad (1)$$

By the standard integration power law,

$$\int_0^1 \gamma^x d\gamma = \lim_{\gamma \rightarrow +0} \frac{-(\gamma^{x+1} - 1)}{x+1} \quad (2)$$

which, if  $x > 0$ , approaches  $1/(1+x)$  as  $\gamma$  approaches 0 from  $\gamma > 0$ .
